# Supplementary material for: In Situ-Derived N-Doped ZnO from ZIF-8 for Enhanced Ethanol Sensing in ZnO/MEMS Devices
Source: MDPI journal article supplement (doi:10.3390/molecules29081703), 2024-04-10
Supplement: s1 [file s1]

## Supporting Information

# In Situ-Derived N-Doped ZnO from ZIF-8 for Enhanced Ethanol Sensing in ZnO/MEMS Devices

Meihua Liang <sup>1</sup>, Yong Yan <sup>1</sup>, Jiaxuan Yang <sup>1</sup>, Xiaodong Liu <sup>2</sup>, Rongrong Jia <sup>2</sup>, Yuanyuan Ge <sup>1</sup>, Zhili Li <sup>1,\*</sup> and Lei Huang <sup>2,\*</sup>

<sup>1</sup> School of Chemistry and Chemical Engineering, Guangxi University, Nanning 530004, China; 2114391048@st.gxu.edu.cn (M.L.); 2214302082@st.gxu.edu.cn (Y.Y.); 2114391118@st.gxu.edu.cn (J.Y.); geeyy@gxu.edu.cn (Y.G.)

<sup>2</sup> Research Center of Nano Science and Technology, College of Sciences, Shanghai University, Shanghai 200444, China; 18952692333@shu.edu.cn (X.L.); r.jia@t.shu.edu.cn (R.J.)

\* Correspondence: lizhili@gxu.edu.cn (Z.L.); leihuang@shu.edu.cn (L.H.)

## Supporting Figure

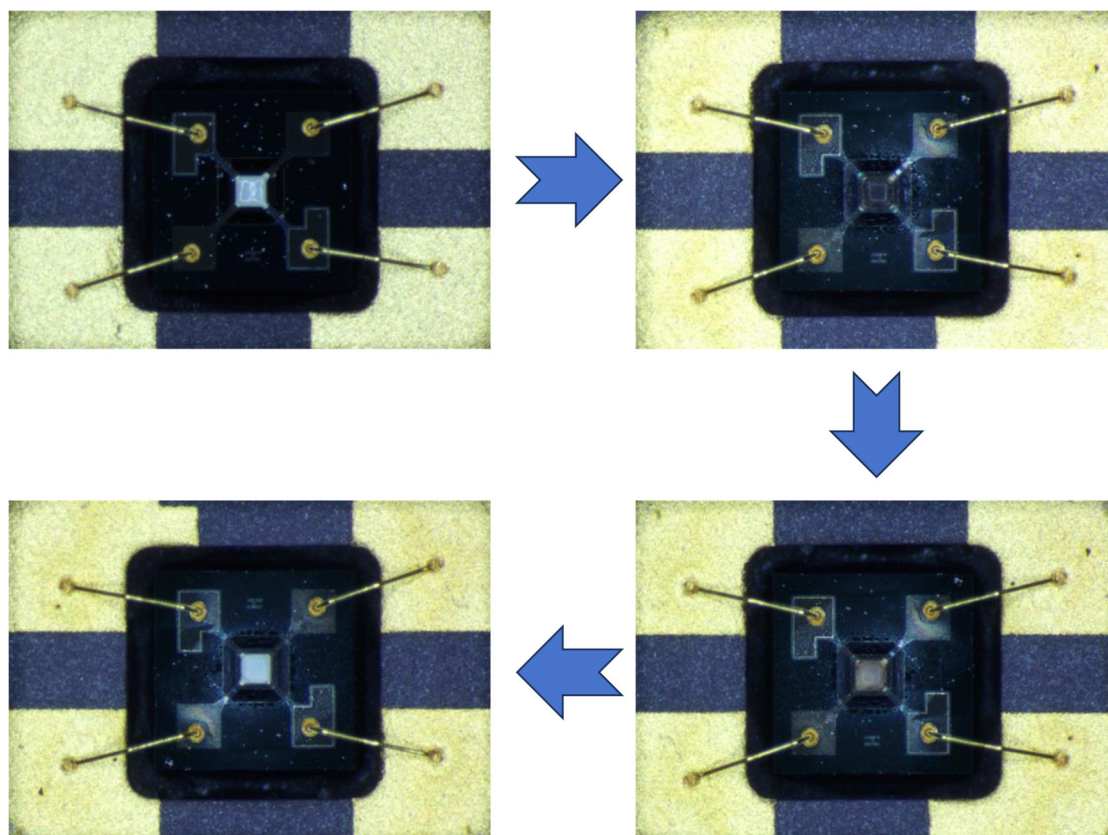

Figure S1. Photos showing the color change of the chip due to the heating of the gas-sensitive film

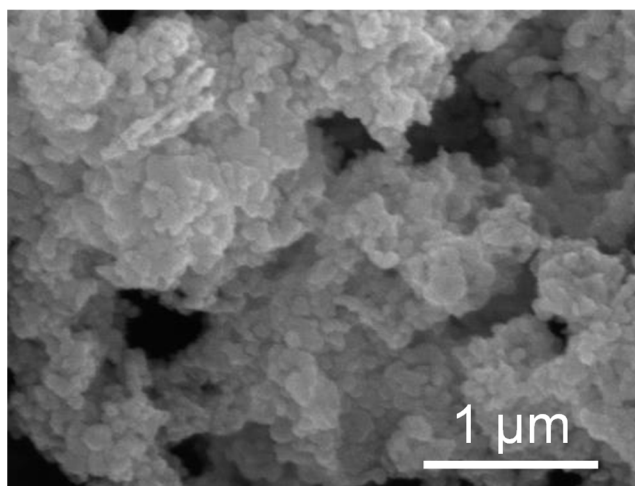

Figure S2. SEM images of ZIF (3) - ZnO nanoparticles

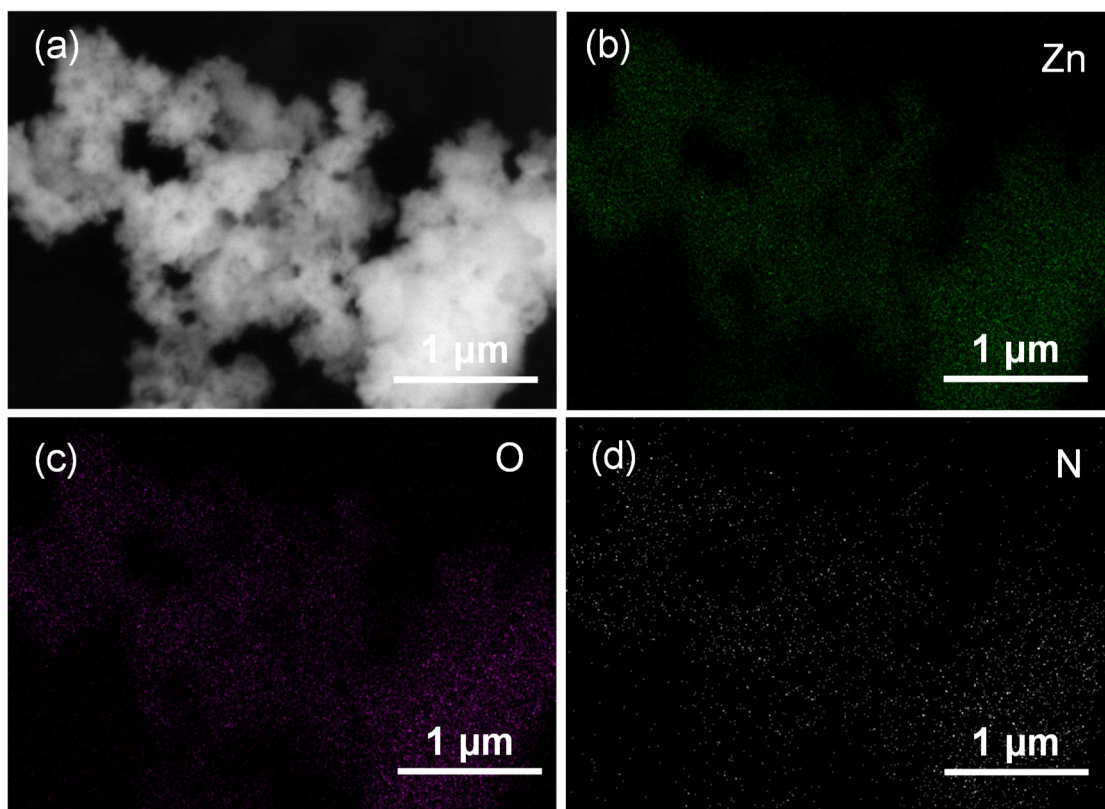

Figure S3. SEM images of ZIF (3) - ZnO nanoparticles (a), element mapping of ZIF (3) - ZnO nanoparticles with uniform distribution of C, N, O, and Zn (b-d)

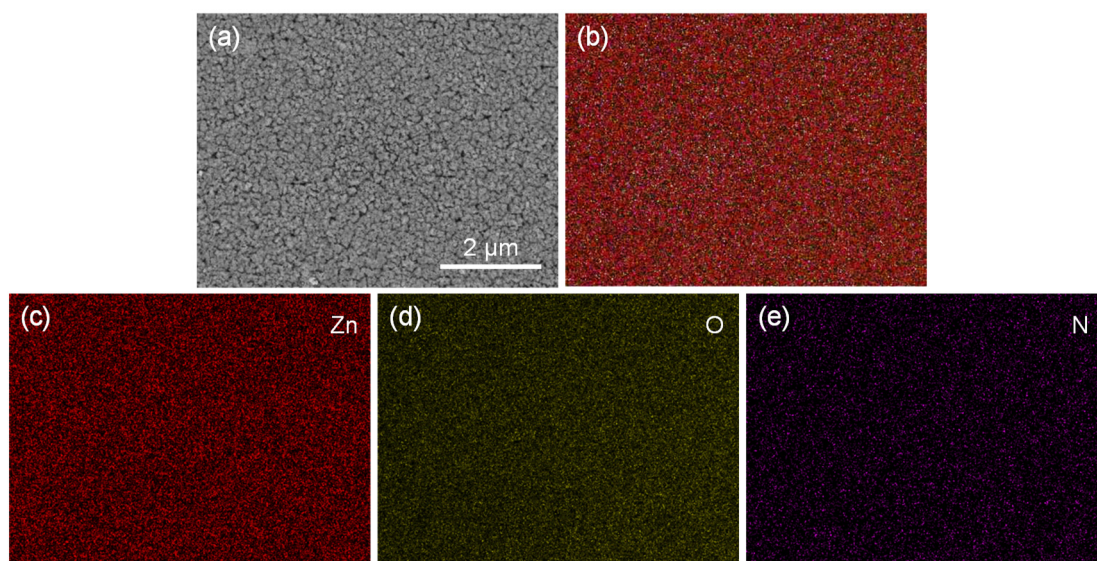

Figure S4. SEM images of ZIF (3) -ZnO/MEMS (a); C, N, O, and element mapping of uniformly distributed ZIF (3)-ZnO/MEMS (b-e)

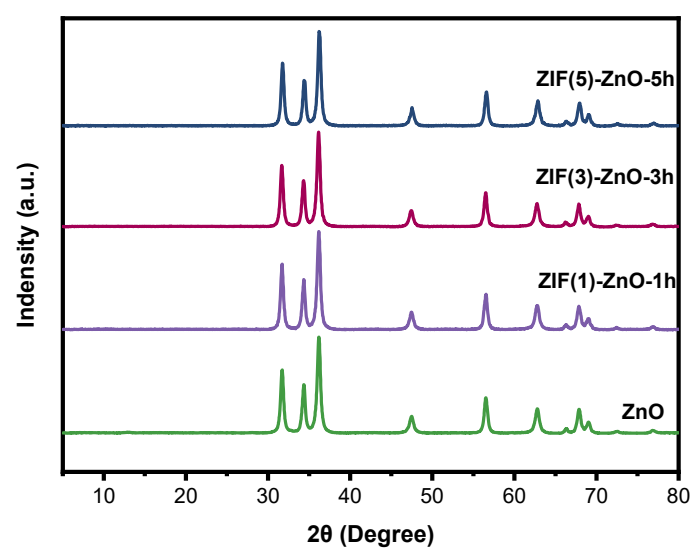

Figure S5. XRD spectra of ZnO, ZIF (1)-ZnO, ZIF (3)-ZnO, and ZIF (5)-ZnO

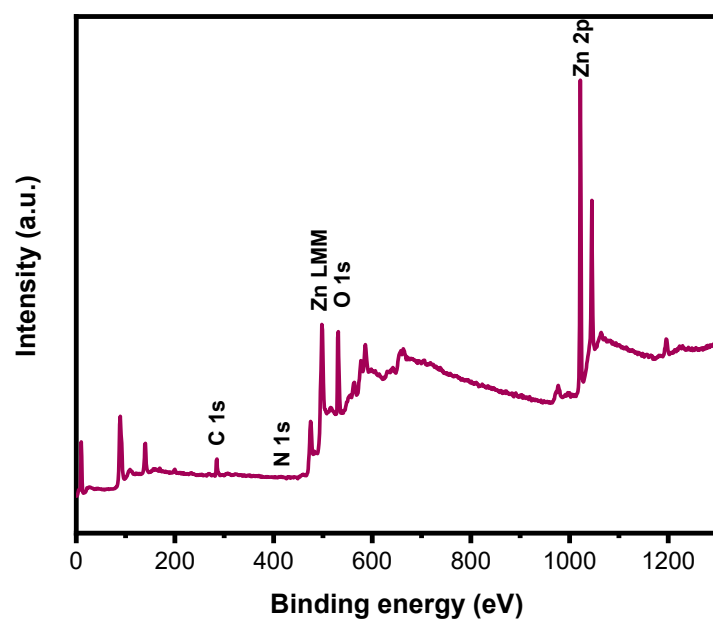

Figure S6.XPS full spectrum of ZIF (3)-ZnO nanoparticles

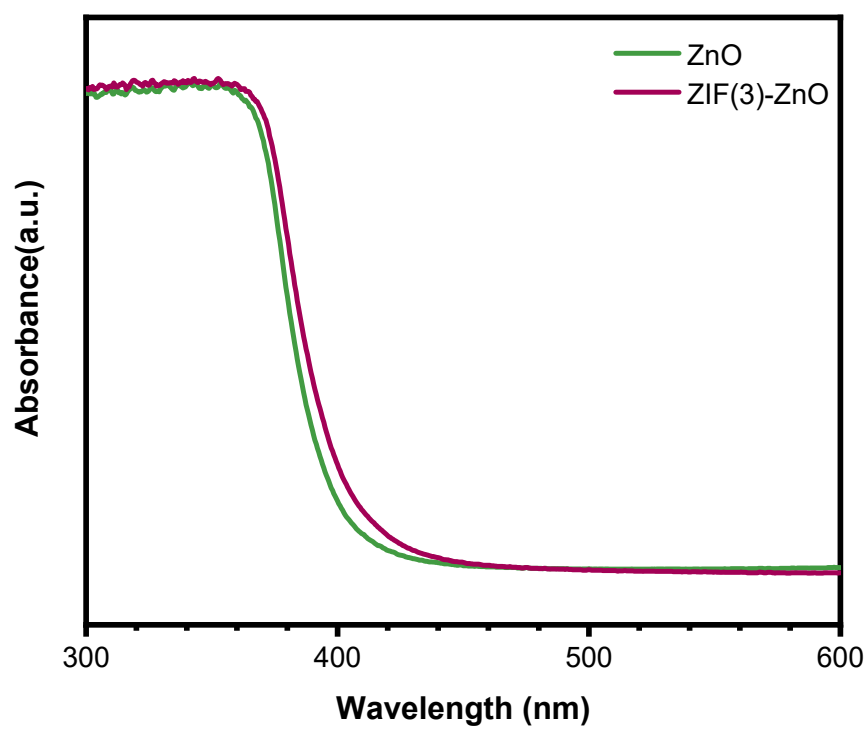

Figure S7. UV-Vis absorption spectra of ZnO and ZIF (3)-ZnO nanoparticles



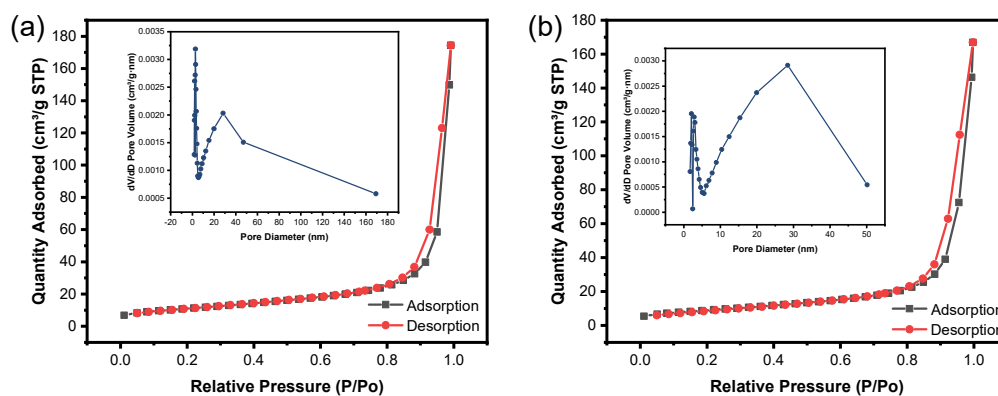

Figure S8. N<sub>2</sub> adsorption isotherms and pore size distributions of (a) ZnO; (b) ZIF (3)-ZnO

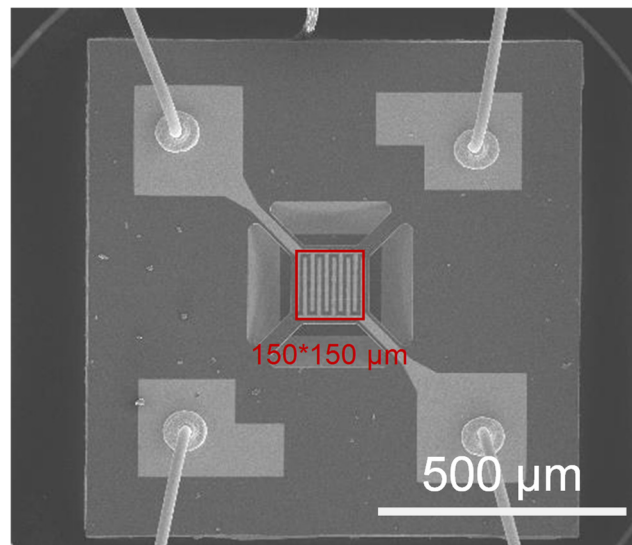

Figure S9. SEM images of blank MEMS chips

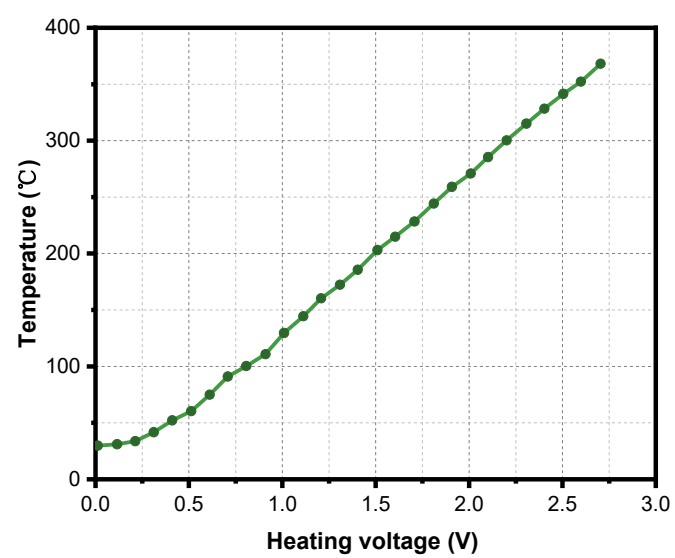

Figure S10. The relations between temperature and heating voltage

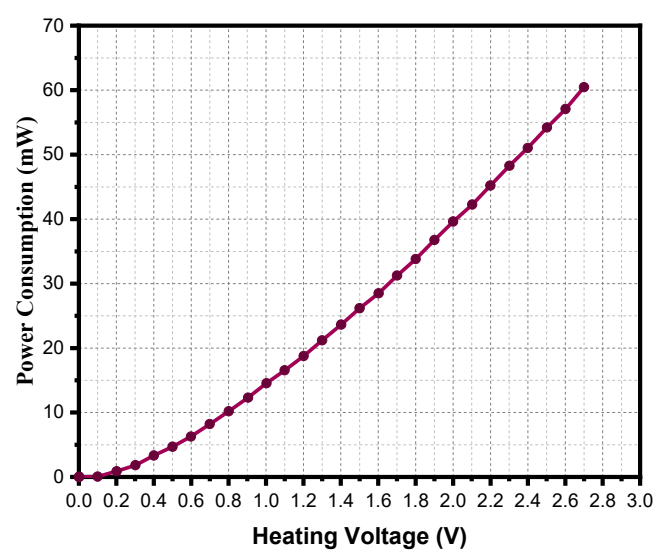

Figure S11. The relations between the power consumption and heating voltage

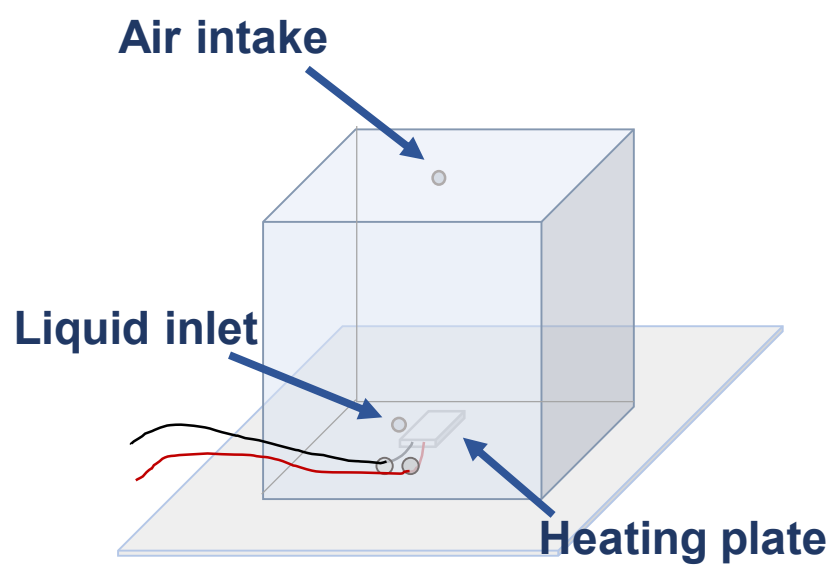

Figure S12. Gas generation device

## Supporting Table

Table S1. Specific surface area, pore size, and pore volume of ZnO and ZIF (3)-ZnO

| Samples  | S <sub>BET</sub> (m <sup>2</sup> /g) | D <sub>pore</sub> (nm) | V <sub>pore</sub> (cm <sup>3</sup> /g) |
|----------|--------------------------------------|------------------------|----------------------------------------|
| ZnO      | 39.29                                | 27.48                  | 0.27                                   |
| N-ZnO-3h | 32.74                                | 27.69                  | 0.26                                   |

Table S2. A comparison of the ethanol sensing performance of the sensors.

| Sensing materials                    | [C <sub>2</sub> H <sub>5</sub> OH] (ppm) | R <sub>a</sub> /R <sub>g</sub> | T <sub>sens</sub> (°C) | Refs.     |
|--------------------------------------|------------------------------------------|--------------------------------|------------------------|-----------|
| ZnO nanosheet                        | 25                                       | 15                             | 400                    | [1]       |
| Double-shell ZnO hollow microspheres | 100                                      | 47.4                           | 275                    | [2]       |
| HHQD-ZnO nanocages                   | 100                                      | 139.4                          | 325                    | [3]       |
| ZnO cubes                            | 5                                        | 1.9                            | 400                    | [4]       |
| ZnO@ZIF-8 porous nanosheets          | 50                                       | 58                             | 240                    | [5]       |
| ZnO@ZIF-8 core-shell material        | 100                                      | 35.9                           | 160                    | [6]       |
| NC-ZnO                               | 50                                       | 124                            | 375                    | [7]       |
| N-ZnO                                | 100                                      | 115                            | 190                    | [8]       |
| ZIF (3)-ZnO/MEMS                     | 25                                       | 80.2                           | 290                    | This work |

Table S3. Definition of samples

| Sample           | Definition                                                                                              |
|------------------|---------------------------------------------------------------------------------------------------------|
| ZnO              | Untreated ZnO                                                                                           |
| ZnO/MEMS         | ZnO deposited on MEMS chip                                                                              |
| ZIF (1)-ZnO      | Nanoparticles derived from the growth of ZIF-8 on ZnO nanoparticles for 1 h followed by heat treatment. |
| ZIF (3)-ZnO      | Nanoparticles derived from the growth of ZIF-8 on ZnO nanoparticles for 3 h followed by heat treatment. |
| ZIF (5)-ZnO      | Nanoparticles derived from the growth of ZIF-8 on ZnO nanoparticles for 5 h followed by heat treatment. |
| ZIF (1)-ZnO/MEMS | The ZnO/MEMS chip that underwent heat treatment after 1 h of in-situ growth of ZIF-8.                   |
| ZIF (3)-ZnO/MEMS | The ZnO/MEMS chip that underwent heat treatment after 3 h of in-situ growth of ZIF-8.                   |
| ZIF (5)-ZnO/MEMS | The ZnO/MEMS chip that underwent heat treatment after 5 h of in-situ growth of ZIF-8.                   |



Table S4. points at the baseline without target gas

|                |         |         |         |         |         |         |         |         |
|----------------|---------|---------|---------|---------|---------|---------|---------|---------|
| y <sub>i</sub> | 0.99259 | 1       | 0.99778 | 0.99111 | 0.99432 | 0.99901 | 1       | 0.99876 |
|                | 0.99827 | 0.99827 | 0.99975 | 1.00049 | 1.00346 | 1.00569 | 0.99555 | 1.00569 |
|                | 0.99852 | 1.00198 | 0.99975 | 1.00148 | 0.99506 | 1.00223 | 1.00124 | 1.0047  |
|                | 0.99506 | 0.99679 | 1.00668 | 1.00396 | 0.99407 | 1.00148 |         |         |

The exact procedures used for calculation of LOD.

$$\text{LOD (ppm)} = 3 \frac{\text{rms}}{\text{slope}}$$

$$\text{rms}_{\text{noise}} = \sqrt{\frac{V_{x^2}}{N}}$$

$$V_{x^2} = \sum (y_i - y)^2$$

Where y<sub>i</sub> is the measured response data at the baseline without target gas, y is the optimal response value (y=1) without target gas and the N is the number of data points. The sensor noise is y<sub>i</sub>-y and the corresponding y<sub>i</sub> have been shown in Table S4.

The slope of the fitting line for the ZIF (3)-ZnO/MEMS sensor was 1.03 (Figure S14)

The rms noise is calculated as rms<sub>noise</sub>=0.00396

$$\text{LOD (ppm)} = 3 \times \text{rms} \div \text{slope} = 3 \times 0.00396 \div 1.03 = 0.0115 \text{ ppm} = 11.5 \text{ ppb}$$

## References

1. Cao, F.F.; Li, C.P.; Li, M.J.; Li, H.J.; Huang, X.; Yang, B.H. Direct growth of Al-doped ZnO ultrathin nanosheets on electrode for ethanol gas sensor application. *Appl. Surf. Sci.* **2018**, 447, 173-181. <https://doi.org/10.1016/j.apsusc.2018.03.217>
2. Jiang, B.; Tao, W.; Zhao, L.P.; Wang, T.S.; Liu, X.M.; Liu, F.M.; Yan, X.; Sun, Y.F.; Lu, G.Y.; Sun, P. Double-shell ZnO hollow microspheres prepared by template-free method for ethanol detection. *Sensors and Actuators B-Chemical*. **2023**, 385, 133626. <https://doi.org/10.1016/j.snb.2023.133626>
3. Zhang, X.; Lan, W.Y.; Xu, J.L.; Luo, Y.T.; Pan, J.; Liao, C.Y.; Yang, L.Y.; Tan, W.H.; Huang, X.T. ZIF-8 derived hierarchical hollow ZnO nanocages with quantum dots for sensitive ethanol gas detection. *Sensors and Actuators B-Chemical*. **2019**, 289, 144-152. <https://doi.org/10.1016/j.snb.2019.03.090>
4. Li, W.H.; Wu, X.F.; Liu, H.D.; Chen, J.Y.; Tang, W.X.; Chen, Y.F. Hierarchical hollow ZnO cubes constructed using self-sacrificial ZIF-8 frameworks and their enhanced benzene gas-sensing properties. *New J. Chem.* **2015**, 39 (9), 7060-7065. <https://doi.org/10.1039/c5nj00549c>
5. Liu, T.T.; Jia, X.H.; Zhang, J.T.; Yang, J.; Wang, S.Z.; Li, Y.; Shao, D.; Feng, L.; Song, H.J. Selective detection of ethanol at low concentration by ZnO@ZIF-8 porous nanosheets. *Sensors and Actuators B-Chemical*. **2022**, 372, 132661. <https://doi.org/10.1016/j.snb.2022.132661>
6. Ren, G.J.; Li, Z.M.; Yang, W.T.; Faheem, M.; Xing, J.B.; Zou, X.Q.; Pan, Q.H.; Zhu, G.S.; Du, Y. ZnO@ZIF-8 core-shell microspheres for improved ethanol gas sensing. *Sensors and Actuators B-Chemical*. **2019**, 284, 421-427. <https://doi.org/10.1016/j.snb.2018.12.145>
7. Qi, T.J.; Yang, X.; Sun, J. Neck-connected ZnO films derived from core-shell zeolitic imidazolate framework-8 (ZIF-8)@ZnO for highly sensitive ethanol gas sensors. *Sensors and Actuators B-Chemical*. **2019**, 283, 93-98. <https://doi.org/10.1016/j.snb.2018.12.010>
8. Fu, H.; Feng, Z.; Liu, S.; Wang, P.; Zhao, C.; Wang, C. Enhanced ethanol sensing performance of N-doped ZnO derived from ZIF-8. *Chin. Chem. Lett.* **2023**, 34 (2), 1001-8417(2023)34:2<107425:Eespon>2.0.Tx;2-1
